# Supplementary material for: The phytochemistry, pharmacology and traditional medicinal use ofGlechomae Herba– a systematic review
Source: Royal Society of Chemistry journal article supplement (doi:10.1039/d1ra01366a), 2021-01-01
Supplement: d1ra01366a1.pdf [file d1ra01366a1.pdf]

Supplementary material to **Table 2**.

| NO. | Preparation name            | Composition                                                                                                                                                                                                                                                                                                  | Traditional and clinical uses                                                                                                                                                                                                                                                                                                                                           |
|-----|-----------------------------|--------------------------------------------------------------------------------------------------------------------------------------------------------------------------------------------------------------------------------------------------------------------------------------------------------------|-------------------------------------------------------------------------------------------------------------------------------------------------------------------------------------------------------------------------------------------------------------------------------------------------------------------------------------------------------------------------|
| 1   | Danle Capsules              | Porcine bile acid, <i>Citri Reticulatae P ericarpium</i> , <i>Crataegi Fructus</i> , <i>Curcuma Radix</i> , <i>Glechomae Herba</i>                                                                                                                                                                           | Used for abdominal pain and gallbladder distension caused by liver stagnation and qi stagnation. Chronic cholecystitis, cholelithiasis to see the above symptoms.                                                                                                                                                                                                       |
| 2   | Huoluo Tincture             | <i>Aconiti Radix</i> , <i>Stephaniae Tetrandrae Radix</i> , <i>Kaempferiae Rhizoma</i> , <i>Glechomae Herba</i> , <i>Corydalis Rhizoma</i> , <i>Zingiberis Rhizoma</i> , Camphor, l-Menthol, Methyl salicylate, <i>Borneolum Syntheticum</i> , <i>Capsici Fructus</i> , <i>Bufois Venenum</i> , Benzoic acid | Comfort the sinews, dispel the cold, promote blood circulation and relieve pain. For pain of muscle and bones, acute sprain, muscle pain and rheumatism, pain of liver area.                                                                                                                                                                                            |
| 3   | Ginqian dantong oral liquid | <i>Glechomae Herba</i> , <i>Lysimachiae Herba</i> , <i>Artemisiae Scopariae Herba</i> , <i>Polygoni Cuspidati Rhizoma Et Radix</i> , <i>Taraxaci Herba</i> , <i>Radix Bupleuri</i> , <i>Cyperi Rhizoma</i> , <i>Cassiae Semen</i> , <i>Radix Salviae</i> , <i>Mume Fructus</i>                               | Qingli damp heat, dredge the liver and gallbladder, pain row stone. For cholelithiasis damp-heat stasis in shaoyang bile - bladder pain. Pain in the right flank, fixed, or secondary colic, on the back of the shoulder, constipation, yellow urine, even the body is yellow fever, dark red tongue, thick greasy or yellow greasy, pulse string slip or string tight. |
| 4   | Niaogan ning Granule        | <i>Lygodiumjaponicum</i> , <i>Glechomae Herba</i> , <i>Pteridis Multifidae Herba</i> , <i>Humulus Scandens (Lour.) Merr.</i> , <i>Violsse Herba</i>                                                                                                                                                          | Clear heat detoxify, drench diuresis. Used for the treatment of dampness-heat syndrome of bladder: frequency of urination, urgency of urination, painful urethra acerbity, yellowish urine color, excessive wet urination, etc. Acute, chronic urinary tract infection seen above symptoms.                                                                             |
| 5   | Lithoex pulsium paste       | <i>Glechomae Herba</i> , <i>Lonice Raejaponicae Caulis</i> , <i>Caulis Akebiae</i> , <i>Pyrrosiae Folium</i> , <i>Dianthi Herba</i> , <i>Radix Cynanchi Paniculati</i> , Talcum, <i>Fructus Malvae Verticillatae</i> , <i>Plantaginis Semen</i> , licorice                                                   | Li shui, tong drench, row stone. For kidney stones, ureteral stones, bladder stones and other urinary calculi.                                                                                                                                                                                                                                                          |
| 6   | Paishi Granules             | <i>Glechomae Herba</i> , <i>Plantaginis Semen</i> , <i>Caulis Akebiae</i> , <i>Radix Cynanchi Paniculati</i> , <i>Pyrrosiae Folium</i> , <i>Lonice Raejaponicae Caulis</i> , Talcum, <i>Dianthi Herba</i> ,                                                                                                  | Clear heat and benefit the water, dripping stone. This product is used for the stone shower caused by the heat and damp of the lower coke. Qin urinary calculi with the above syndrome.                                                                                                                                                                                 |

*Abutili Semen, licorice*

|    |                                                        |                                                                                                                                                                                                                                                                                                                                                                                                                                                                                                                                                                                                                                                                                                                                                                                                                                                                                                                                                                                                                                                                                                                                                                                                                                                                                                                                                                                                       |                                                                                                                                                                                                                 |
|----|--------------------------------------------------------|-------------------------------------------------------------------------------------------------------------------------------------------------------------------------------------------------------------------------------------------------------------------------------------------------------------------------------------------------------------------------------------------------------------------------------------------------------------------------------------------------------------------------------------------------------------------------------------------------------------------------------------------------------------------------------------------------------------------------------------------------------------------------------------------------------------------------------------------------------------------------------------------------------------------------------------------------------------------------------------------------------------------------------------------------------------------------------------------------------------------------------------------------------------------------------------------------------------------------------------------------------------------------------------------------------------------------------------------------------------------------------------------------------|-----------------------------------------------------------------------------------------------------------------------------------------------------------------------------------------------------------------|
| 7  | Qingreli<br>dan<br>granule                             | <p><i>Glechomae Herba, Hypericum<br/>seniavinii Maxim., Pteridis<br/>Multifidae Herba, Violsse Herba<br/>Carthami Flos, Strychni Semen, Aco<br/>nitum Kusnezoffii Reichb, Aconiti Ra<br/>dix, Schizonepetae Herba, Glechoma<br/>e Herba, Saposhnikoviae Radix, A.<br/>Dahurica (Fisch.) Benth. Et Hook, K<br/>aempferiae Rhizoma, Zingiberis Rhiz<br/>oma, Liquidambaris Resina, Borneol<br/>um Syntheticum, Pennyroyal, Ocimu<br/>m Gratissimum Oil, Camphor, Cinna<br/>mon Oil, Benzoic acid, Moschus, Bel<br/>ladonna Liquid Extract<br/>Olibanun, Inulae Radix, Cinnanmomi<br/>Cortex, Glechomae Herba,<br/>Plantaginis Semen, Caulis Akebiae,<br/>Radix Cynanchi Paniculati,<br/>Pyrrosiae Folium, Dianthi Herba,<br/>Lonicerae Japonicae Caulis, Talcum,<br/>licorice, Malvae Semen<br/>Panax Notoginseng (Burk.) F. H. Ch<br/>en Ex C. Chow, Radix Angelicae Bise<br/>ratae, Angelicae Sinensis Radix, Dip<br/>saci Radix, Notopterygii Rhizoma Et<br/>Radix, Gardeniae Fructus, Siegesbec<br/>kia Herba, Acanthopanax gracilisty<br/>lus W.W. Smith, Saposhnikoviae Ra<br/>dix, A. Dahurica (Fisch.) Benth. Et H<br/>ook, Cortex Erythrinae, Radix Cle<br/>matidis, Glechomae Herba, Persic<br/>ae Semen, Radix Rhei Et Rhizome,<br/>Phellodendri Chinrnsis Cortex, Lyc<br/>opi Herba, Lonicerae Japonica<br/>e Flos, Chaenomeles Sinensis (Tho<br/>uin) Koehne, licorice, Rhizome Of</i></p> | <p>Clearing heat and dampness, anti-inflammatory and<br/>cholagogic. For cholecystitis, gallstones with<br/>cholecystitis.</p>                                                                                  |
| 8  | Shexian<br>g Dieda<br>8 Fengshi<br>adhesive<br>plaster | <p><i>Dahurica (Fisch.) Benth. Et Hook, K<br/>aempferiae Rhizoma, Zingiberis Rhiz<br/>oma, Liquidambaris Resina, Borneol<br/>um Syntheticum, Pennyroyal, Ocimu<br/>m Gratissimum Oil, Camphor, Cinna<br/>mon Oil, Benzoic acid, Moschus, Bel<br/>ladonna Liquid Extract<br/>Olibanun, Inulae Radix, Cinnanmomi<br/>Cortex, Glechomae Herba,<br/>Plantaginis Semen, Caulis Akebiae,<br/>Radix Cynanchi Paniculati,<br/>Pyrrosiae Folium, Dianthi Herba,<br/>Lonicerae Japonicae Caulis, Talcum,<br/>licorice, Malvae Semen<br/>Panax Notoginseng (Burk.) F. H. Ch<br/>en Ex C. Chow, Radix Angelicae Bise<br/>ratae, Angelicae Sinensis Radix, Dip<br/>saci Radix, Notopterygii Rhizoma Et<br/>Radix, Gardeniae Fructus, Siegesbec<br/>kia Herba, Acanthopanax gracilisty<br/>lus W.W. Smith, Saposhnikoviae Ra<br/>dix, A. Dahurica (Fisch.) Benth. Et H<br/>ook, Cortex Erythrinae, Radix Cle<br/>matidis, Glechomae Herba, Persic<br/>ae Semen, Radix Rhei Et Rhizome,<br/>Phellodendri Chinrnsis Cortex, Lyc<br/>opi Herba, Lonicerae Japonica<br/>e Flos, Chaenomeles Sinensis (Tho<br/>uin) Koehne, licorice, Rhizome Of</i></p>                                                                                                                                                                                                                                                                 | <p>Dispel wind to wet, remove blood stasis and relieve<br/>pain. For rheumatic pain, injury, swelling and pain.</p>                                                                                             |
| 9  | Shuangx<br>iangpais<br>hi<br>granules                  | <p><i>Dahurica (Fisch.) Benth. Et Hook, K<br/>aempferiae Rhizoma, Zingiberis Rhiz<br/>oma, Liquidambaris Resina, Borneol<br/>um Syntheticum, Pennyroyal, Ocimu<br/>m Gratissimum Oil, Camphor, Cinna<br/>mon Oil, Benzoic acid, Moschus, Bel<br/>ladonna Liquid Extract<br/>Olibanun, Inulae Radix, Cinnanmomi<br/>Cortex, Glechomae Herba,<br/>Plantaginis Semen, Caulis Akebiae,<br/>Radix Cynanchi Paniculati,<br/>Pyrrosiae Folium, Dianthi Herba,<br/>Lonicerae Japonicae Caulis, Talcum,<br/>licorice, Malvae Semen<br/>Panax Notoginseng (Burk.) F. H. Ch<br/>en Ex C. Chow, Radix Angelicae Bise<br/>ratae, Angelicae Sinensis Radix, Dip<br/>saci Radix, Notopterygii Rhizoma Et<br/>Radix, Gardeniae Fructus, Siegesbec<br/>kia Herba, Acanthopanax gracilisty<br/>lus W.W. Smith, Saposhnikoviae Ra<br/>dix, A. Dahurica (Fisch.) Benth. Et H<br/>ook, Cortex Erythrinae, Radix Cle<br/>matidis, Glechomae Herba, Persic<br/>ae Semen, Radix Rhei Et Rhizome,<br/>Phellodendri Chinrnsis Cortex, Lyc<br/>opi Herba, Lonicerae Japonica<br/>e Flos, Chaenomeles Sinensis (Tho<br/>uin) Koehne, licorice, Rhizome Of</i></p>                                                                                                                                                                                                                                                                 | <p>Benefit water, tong drench, discharge stone,<br/>detoxify. Used for stone shower and removal of<br/>urinary stones.</p>                                                                                      |
| 10 | Tianqidi<br>edafeng<br>shi<br>Ointmen<br>t             | <p><i>Dahurica (Fisch.) Benth. Et Hook, K<br/>aempferiae Rhizoma, Zingiberis Rhiz<br/>oma, Liquidambaris Resina, Borneol<br/>um Syntheticum, Pennyroyal, Ocimu<br/>m Gratissimum Oil, Camphor, Cinna<br/>mon Oil, Benzoic acid, Moschus, Bel<br/>ladonna Liquid Extract<br/>Olibanun, Inulae Radix, Cinnanmomi<br/>Cortex, Glechomae Herba,<br/>Plantaginis Semen, Caulis Akebiae,<br/>Radix Cynanchi Paniculati,<br/>Pyrrosiae Folium, Dianthi Herba,<br/>Lonicerae Japonicae Caulis, Talcum,<br/>licorice, Malvae Semen<br/>Panax Notoginseng (Burk.) F. H. Ch<br/>en Ex C. Chow, Radix Angelicae Bise<br/>ratae, Angelicae Sinensis Radix, Dip<br/>saci Radix, Notopterygii Rhizoma Et<br/>Radix, Gardeniae Fructus, Siegesbec<br/>kia Herba, Acanthopanax gracilisty<br/>lus W.W. Smith, Saposhnikoviae Ra<br/>dix, A. Dahurica (Fisch.) Benth. Et H<br/>ook, Cortex Erythrinae, Radix Cle<br/>matidis, Glechomae Herba, Persic<br/>ae Semen, Radix Rhei Et Rhizome,<br/>Phellodendri Chinrnsis Cortex, Lyc<br/>opi Herba, Lonicerae Japonica<br/>e Flos, Chaenomeles Sinensis (Tho<br/>uin) Koehne, licorice, Rhizome Of</i></p>                                                                                                                                                                                                                                                                 | <p>Promote blood circulation and remove blood stasis,<br/>relax the tendons and collaterals, relieve swelling<br/>and pain, and remove wind and dampness. For soft<br/>tissue contusion, rheumatic lumbago.</p> |

---

*Whiteback Greenbrier, Drynariae R*  
*hizoma, l-Menthol, Camphor, Sapp*  
*an Lignum*

---

---
